# Supplementary material
Source: publisher figshare collection journal article supplement (https://sage.figshare.com/ndownloader/files/15572687)
Supplement: Supplementary file 1 [file 15572687]

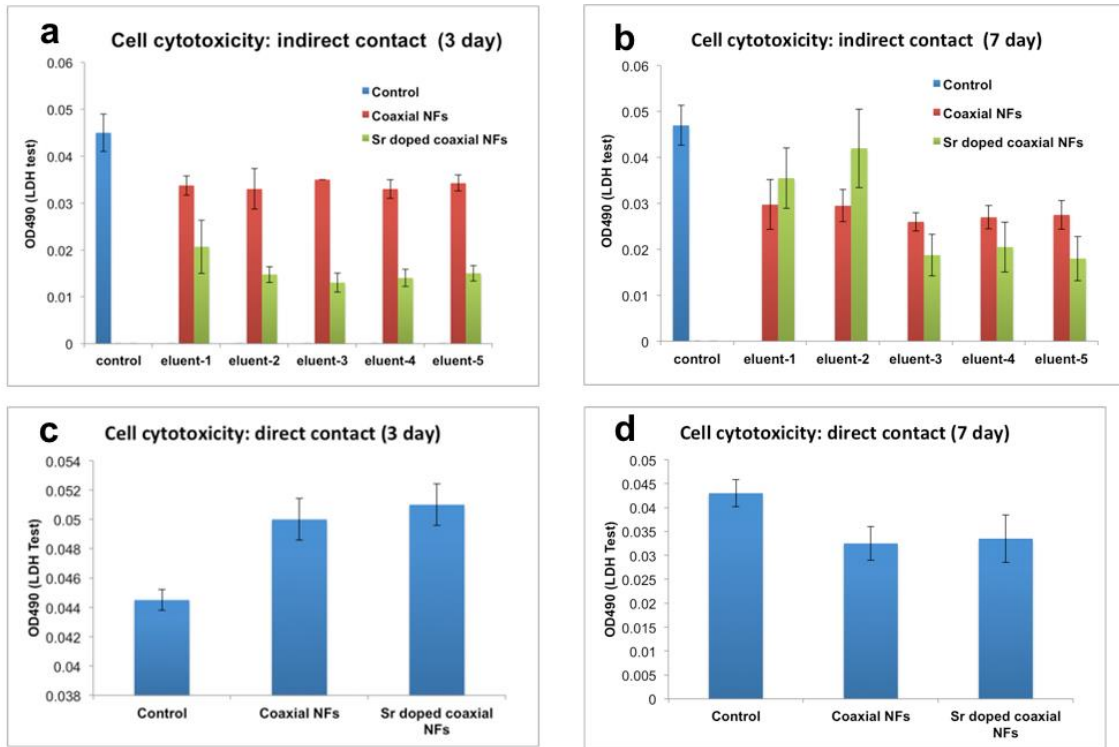

**Supplementary figure 1** The MC3T3-E1 cell cytotoxicity tested by LDH kit: the cells either treated by five degradation eluents for 3 (a) or 7 (b) days (indirect contact approach); or grown on the coaxial NFs with or without strontium for 3(c) or 7(d) days. The control group was the cells grown on the well plates.
